# Supplementary material for: Determinants of Vaccine Acceptance against COVID-19 in China: Perspectives on Knowledge and DrVac-COVID19S Scale
Source: MDPI journal article supplement (doi:10.3390/ijerph182111192), 2021-10-25
Supplement: s1 [file s1]

**Table S1.** The differences between willing, refused, hesitated attitude among preventive measure of COVID-19.

| Items                                                                               | All       | Attitude of Being Vaccinated |          |            | <i>P</i> |
|-------------------------------------------------------------------------------------|-----------|------------------------------|----------|------------|----------|
|                                                                                     |           | Willingness                  | Refusal  | Hesitation |          |
| 1. When I meet my friends and colleagues, I will always greet them with a handshake |           |                              |          |            | 0.001    |
| strongly agree                                                                      | 106(5.5)  | 106(5.9)                     | 0(0)     | 0(0)       |          |
| agree                                                                               | 316(16.5) | 304(17)                      | 3(5.9)   | 9(13.4)    |          |
| uncertain                                                                           | 508(26.6) | 473(26.4)                    | 14(27.5) | 21(31.3)   |          |
| disagree                                                                            | 736(38.5) | 672(37.5)                    | 32(62.7) | 32(47.8)   |          |
| strongly disagree                                                                   | 244(12.8) | 237(13.2)                    | 2(3.9)   | 5(7.5)     |          |
| 2. When I meet my friends and colleagues, I will always greet them with a hug       |           |                              |          |            | 0.012    |
| strongly agree                                                                      | 68(3.6)   | 68(3.8)                      | 0(0)     | 0(0)       |          |
| agree                                                                               | 113(5.9)  | 108(6)                       | 2(3.9)   | 3(4.5)     |          |
| uncertain                                                                           | 414(21.7) | 390(21.8)                    | 12(23.5) | 12(17.9)   |          |
| disagree                                                                            | 943(49.4) | 866(48.3)                    | 35(68.6) | 42(62.7)   |          |
| strongly disagree                                                                   | 372(19.5) | 360(20.1)                    | 2(3.9)   | 10(14.9)   |          |
| 3. I wash my hands regularly and for enough period of time                          |           |                              |          |            | <0.001   |
| strongly agree                                                                      | 907(47.5) | 887(49.5)                    | 4(7.8)   | 16(23.9)   |          |
| agree                                                                               | 853(44.7) | 815(45.5)                    | 9(17.6)  | 29(43.3)   |          |
| uncertain                                                                           | 84(4.4)   | 63(3.5)                      | 13(25.5) | 8(11.9)    |          |
| disagree                                                                            | 60(3.1)   | 22(1.2)                      | 24(47.1) | 14(20.9)   |          |
| strongly disagree                                                                   | 6(0.3)    | 5(0.3)                       | 1(2)     | 0(0)       |          |
| 4. I usually put a facemask to protect myself from the risk of infection            |           |                              |          |            | <0.001   |
| strongly agree                                                                      | 996(52.1) | 958(53.5)                    | 17(33.3) | 21(31.3)   |          |
| agree                                                                               | 802(42)   | 737(41.1)                    | 23(45.1) | 42(62.7)   |          |
| uncertain                                                                           | 88(4.6)   | 79(4.4)                      | 5(9.8)   | 4(6)       |          |
| disagree                                                                            | 17(0.9)   | 11(0.6)                      | 6(11.8)  | 0(0)       |          |

|                                                                                                                                                                                                  |            |            |          |          |        |
|--------------------------------------------------------------------------------------------------------------------------------------------------------------------------------------------------|------------|------------|----------|----------|--------|
| strongly disagree                                                                                                                                                                                | 7(0.4)     | 7(0.4)     | 0(0)     | 0(0)     |        |
| 5. If I find that I contacted a person infected with the virus, I will inform the health authorities                                                                                             |            |            |          |          | <0.001 |
| strongly agree                                                                                                                                                                                   | 1253(65.6) | 1221(68.1) | 5(9.8)   | 27(40.3) |        |
| agree                                                                                                                                                                                            | 593(31)    | 535(29.9)  | 28(54.9) | 30(44.8) |        |
| uncertain                                                                                                                                                                                        | 48(2.5)    | 27(1.5)    | 13(25.5) | 8(11.9)  |        |
| disagree                                                                                                                                                                                         | 10(0.5)    | 3(0.2)     | 5(9.8)   | 2(3)     |        |
| strongly disagree                                                                                                                                                                                | 6(0.3)     | 6(0.3)     | 0(0)     | 0(0)     |        |
| 6. If I have any of the symptoms associated with the disease, I will inform the health authorities                                                                                               |            |            |          |          | <0.001 |
| strongly agree                                                                                                                                                                                   | 1091(57.1) | 1064(59.4) | 5(9.8)   | 22(32.8) |        |
| agree                                                                                                                                                                                            | 684(35.8)  | 627(35)    | 26(51)   | 31(46.3) |        |
| uncertain                                                                                                                                                                                        | 108(5.7)   | 81(4.5)    | 15(29.4) | 12(17.9) |        |
| disagree                                                                                                                                                                                         | 18(0.9)    | 12(0.7)    | 5(9.8)   | 1(1.5)   |        |
| strongly disagree                                                                                                                                                                                | 9(0.5)     | 8(0.4)     | 0(0)     | 1(1.5)   |        |
| 7. If I find that I contacted a person infected with the virus, I agree to be isolated at home for a certain period of time until it is proven that I am free from the disease                   |            |            |          |          | <0.001 |
| strongly agree                                                                                                                                                                                   | 1184(62)   | 1144(63.8) | 11(21.6) | 29(43.3) |        |
| agree                                                                                                                                                                                            | 602(31.5)  | 542(30.2)  | 30(58.8) | 30(44.8) |        |
| uncertain                                                                                                                                                                                        | 51(2.7)    | 41(2.3)    | 4(7.8)   | 6(9)     |        |
| disagree                                                                                                                                                                                         | 43(2.3)    | 35(2)      | 6(11.8)  | 2(3)     |        |
| strongly disagree                                                                                                                                                                                | 30(1.6)    | 30(1.7)    | 0(0)     | 0(0)     |        |
| 8. If I found that I contacted a person infected with the virus, I agree to be isolated at an isolation hospital for a certain period of time until it is proven that I am free from the disease |            |            |          |          | <0.001 |
| strongly agree                                                                                                                                                                                   | 1214(63.6) | 1176(65.6) | 11(21.6) | 27(40.3) |        |
| agree                                                                                                                                                                                            | 625(32.7)  | 566(31.6)  | 30(58.8) | 29(43.3) |        |
| uncertain                                                                                                                                                                                        | 55(2.9)    | 40(2.2)    | 5(9.8)   | 10(14.9) |        |
| disagree                                                                                                                                                                                         | 13(0.7)    | 7(0.4)     | 5(9.8)   | 1(1.5)   |        |

|                                                                                                                   |            |            |          |          |        |
|-------------------------------------------------------------------------------------------------------------------|------------|------------|----------|----------|--------|
| strongly disagree                                                                                                 | 3(0.2)     | 3(0.2)     | 0(0)     | 0(0)     |        |
| 9. If I am asked to be isolated for a certain period of time, I think my salary will continued during this period |            |            |          |          | <0.001 |
| strongly agree                                                                                                    | 550(28.8)  | 540(30.1)  | 0(0)     | 10(14.9) |        |
| agree                                                                                                             | 589(30.8)  | 531(29.6)  | 30(58.8) | 28(41.8) |        |
| uncertain                                                                                                         | 429(22.5)  | 409(22.8)  | 7(13.7)  | 13(19.4) |        |
| disagree                                                                                                          | 259(13.6)  | 232(12.9)  | 14(27.5) | 13(19.4) |        |
| strongly disagree                                                                                                 | 83(4.3)    | 80(4.5)    | 0(0)     | 3(4.5)   |        |
| 10. If I am asked to be isolated for a certain period of time, my salary should be continued during this period   |            |            |          |          | <0.001 |
| strongly agree                                                                                                    | 644(33.7)  | 632(35.3)  | 0(0)     | 12(17.9) |        |
| agree                                                                                                             | 745(39)    | 667(37.2)  | 43(84.3) | 35(52.2) |        |
| uncertain                                                                                                         | 339(17.7)  | 319(17.8)  | 7(13.7)  | 13(19.4) |        |
| disagree                                                                                                          | 133(7)     | 129(7.2)   | 1(2)     | 3(4.5)   |        |
| strongly disagree                                                                                                 | 49(2.6)    | 45(2.5)    | 0(0)     | 4(6)     |        |
| 11. If there is an available lab test for detection of the virus, I am willing to do it                           |            |            |          |          | <0.001 |
| strongly agree                                                                                                    | 1100(57.6) | 1028(57.4) | 38(74.5) | 34(50.7) |        |
| agree                                                                                                             | 765(40.1)  | 728(40.6)  | 10(19.6) | 27(40.3) |        |
| uncertain                                                                                                         | 40(2.1)    | 31(1.7)    | 3(5.9)   | 6(9)     |        |
| disagree                                                                                                          | 2(0.1)     | 2(0.1)     | 0(0)     | 0(0)     |        |
| strongly disagree                                                                                                 | 3(0.2)     | 3(0.2)     | 0(0)     | 0(0)     |        |
| 12. If there is an available vaccine for the virus, I am willing to get it                                        |            |            |          |          | <0.001 |
| strongly agree                                                                                                    | 1001(52.4) | 993(55.4)  | 3(5.9)   | 5(7.5)   |        |
| agree                                                                                                             | 772(40.4)  | 747(41.7)  | 7(13.7)  | 18(26.9) |        |
| uncertain                                                                                                         | 76(4)      | 43(2.4)    | 4(7.8)   | 29(43.3) |        |
| disagree                                                                                                          | 48(2.5)    | 4(0.2)     | 30(58.8) | 14(20.9) |        |

|                                                                                                                                                       |           |           |          |          |        |
|-------------------------------------------------------------------------------------------------------------------------------------------------------|-----------|-----------|----------|----------|--------|
| strongly disagree                                                                                                                                     | 13(0.7)   | 5(0.3)    | 7(13.7)  | 1(1.5)   | <0.001 |
| 13. I usually follow the updates about the spread of the virus in my country                                                                          |           |           |          |          |        |
| strongly agree                                                                                                                                        | 908(47.5) | 892(49.8) | 3(5.9)   | 13(19.4) |        |
| agree                                                                                                                                                 | 845(44.2) | 801(44.7) | 13(25.5) | 31(46.3) |        |
| uncertain                                                                                                                                             | 116(6.1)  | 81(4.5)   | 20(39.2) | 15(22.4) |        |
| disagree                                                                                                                                              | 30(1.6)   | 13(0.7)   | 11(21.6) | 6(9)     | <0.001 |
| strongly disagree                                                                                                                                     | 11(0.6)   | 5(0.3)    | 4(7.8)   | 2(3)     |        |
| 14. I usually follow the updates about the spread of the virus worldwide                                                                              |           |           |          |          |        |
| strongly agree                                                                                                                                        | 861(45.1) | 844(47.1) | 3(5.9)   | 14(20.9) |        |
| agree                                                                                                                                                 | 854(44.7) | 814(45.4) | 11(21.6) | 29(43.3) |        |
| uncertain                                                                                                                                             | 149(7.8)  | 110(6.1)  | 22(43.1) | 17(25.4) | <0.001 |
| disagree                                                                                                                                              | 34(1.8)   | 17(0.9)   | 11(21.6) | 6(9)     |        |
| strongly disagree                                                                                                                                     | 12(0.6)   | 7(0.4)    | 4(7.8)   | 1(1.5)   |        |
| 15. If a lecture about the virus is organized near me, I will attend it                                                                               |           |           |          |          |        |
| strongly agree                                                                                                                                        | 609(31.9) | 602(33.6) | 0(0)     | 7(10.4)  | <0.001 |
| agree                                                                                                                                                 | 708(37.1) | 678(37.8) | 10(19.6) | 20(29.9) |        |
| uncertain                                                                                                                                             | 526(27.5) | 459(25.6) | 32(62.7) | 35(52.2) |        |
| disagree                                                                                                                                              | 60(3.1)   | 46(2.6)   | 9(17.6)  | 5(7.5)   |        |
| strongly disagree                                                                                                                                     | 7(0.4)    | 7(0.4)    | 0(0)     | 0(0)     |        |
| 16. If flyers or brochures that include information about the disease are distributed, I will read them and follow the instructions mentioned in them |           |           |          |          | <0.001 |
| strongly agree                                                                                                                                        | 865(45.3) | 846(47.2) | 8(15.7)  | 11(16.4) | <0.001 |
| agree                                                                                                                                                 | 902(47.2) | 847(47.3) | 15(29.4) | 40(59.7) |        |
| uncertain                                                                                                                                             | 117(6.1)  | 82(4.6)   | 21(41.2) | 14(20.9) |        |
| disagree                                                                                                                                              | 20(1)     | 11(0.6)   | 7(13.7)  | 2(3)     |        |
| strongly disagree                                                                                                                                     | 6(0.3)    | 6(0.3)    | 0(0)     | 0(0)     |        |

**Table S2.** The differences between willing, refused, hesitated attitude among knowledge of COVID-19 vaccination.

| Items                                                                  | All       | Attitude of Being Vaccinated |          |            | <i>P</i> |
|------------------------------------------------------------------------|-----------|------------------------------|----------|------------|----------|
|                                                                        |           | Willingness                  | Refusal  | Hesitation |          |
| 1. Vaccination is a very effective way to protect me against COVID-19. |           |                              |          |            | <0.001   |
| Strongly disagree                                                      | 32(1.7)   | 32(1.8)                      | 0(0)     | 0(0)       |          |
| Disagree                                                               | 13(0.7)   | 10(0.6)                      | 1(2)     | 3(3)       |          |
| Slightly disagree                                                      | 66(3.5)   | 59(3.3)                      | 2(5.9)   | 5(7.5)     |          |
| Neither disagree nor agree                                             | 305(16)   | 261(14.6)                    | 18(35.3) | 26(38.8)   |          |
| Slightly agree                                                         | 236(12.4) | 220(12.3)                    | 5(9.8)   | 11(16.4)   |          |
| Agree                                                                  | 732(38.3) | 691(38.6)                    | 23(45.1) | 18(26.9)   |          |
| Strongly agree                                                         | 526(27.5) | 519(29)                      | 2(3.9)   | 5(7.5)     |          |
| 2. I know very well how vaccination protects me from COVID-19.         |           |                              |          |            | <0.001   |
| Strongly disagree                                                      | 90(4.7)   | 44(2.5)                      | 29(56.9) | 17(25.4)   |          |
| Disagree                                                               | 43(2.3)   | 24(1.3)                      | 12(23.5) | 7(10.4)    |          |
| Slightly disagree                                                      | 39(2)     | 36(2)                        | 0(0)     | 3(4.5)     |          |
| Neither disagree nor agree                                             | 337(17.6) | 310(17.3)                    | 4(7.8)   | 23(34.3)   |          |
| Slightly agree                                                         | 223(11.7) | 213(11.9)                    | 1(2)     | 9(13.4)    |          |
| Agree                                                                  | 691(36.2) | 685(38.2)                    | 2(5.9)   | 3(4.5)     |          |
| Strongly agree                                                         | 487(25.5) | 480(26.8)                    | 2(3.9)   | 5(7.5)     |          |
| 3. It is important that I get the COVID-19 jab.                        |           |                              |          |            | <0.001   |
| Strongly disagree                                                      | 8(0.4)    | 8(0.4)                       | 0(0)     | 0(0)       |          |
| Disagree                                                               | 6(0.3)    | 4(0.2)                       | 2(3.9)   | 0(0)       |          |
| Slightly disagree                                                      | 10(0.5)   | 5(0.3)                       | 0(0)     | 5(7.5)     |          |
| Neither disagree nor agree                                             | 75(3.9)   | 49(2.7)                      | 13(25.5) | 13(19.4)   |          |
| Slightly agree                                                         | 127(6.6)  | 103(5.7)                     | 7(13.7)  | 17(25.4)   |          |
| Agree                                                                  | 812(42.5) | 772(43.1)                    | 20(39.2) | 20(29.9)   |          |

|                                                                                       |           |           |          |          |        |
|---------------------------------------------------------------------------------------|-----------|-----------|----------|----------|--------|
| Strongly agree                                                                        | 872(45.7) | 851(47.5) | 9(17.6)  | 12(17.9) | <0.001 |
| 4. Vaccination greatly reduces my risk of catching COVID-19.                          |           |           |          |          |        |
| Strongly disagree                                                                     | 11(0.6)   | 11(0.6)   | 0(0)     | 0(0)     |        |
| Disagree                                                                              | 4(0.2)    | 3(0.2)    | 0(0)     | 1(1.5)   |        |
| Slightly disagree                                                                     | 10(0.5)   | 3(0.2)    | 2(3.9)   | 5(7.5)   |        |
| Neither disagree nor agree                                                            | 128(6.7)  | 100(5.6)  | 14(27.5) | 14(20.9) |        |
| Slightly agree                                                                        | 148(7.7)  | 126(7)    | 5(9.8)   | 17(25.4) |        |
| Agree                                                                                 | 747(39.1) | 715(39.9) | 14(27.5) | 18(26.9) | <0.001 |
| Strongly agree                                                                        | 862(45.1) | 834(46.5) | 16(31.4) | 12(17.9) |        |
| 5. I understand how the flu jab helps my body fight the COVID-19 virus.               |           |           |          |          |        |
| Strongly disagree                                                                     | 18(0.9)   | 14(0.8)   | 3(5.9)   | 1(1.5)   |        |
| Disagree                                                                              | 13(0.7)   | 9(0.5)    | 0(0)     | 4(6)     |        |
| Slightly disagree                                                                     | 30(1.6)   | 24(1.3)   | 3(5.9)   | 3(4.5)   |        |
| Neither disagree nor agree                                                            | 315(16.5) | 280(15.6) | 15(29.4) | 20(29.9) |        |
| Slightly agree                                                                        | 242(12.7) | 226(12.6) | 4(7.8)   | 12(17.9) | <0.001 |
| Agree                                                                                 | 683(35.8) | 653(36.4) | 14(27.5) | 16(23.9) |        |
| Strongly agree                                                                        | 609(31.9) | 586(32.7) | 12(23.5) | 11(16.4) |        |
| 6. The COVID-19 jab plays an important role in protecting my life and that of others. |           |           |          |          |        |
| Strongly disagree                                                                     | 10(0.5)   | 10(0.6)   | 0(0)     | 0(0)     |        |
| Disagree                                                                              | 7(0.4)    | 7(0.4)    | 0(0)     | 0(0)     |        |
| Slightly disagree                                                                     | 19(1)     | 14(0.8)   | 2(3.9)   | 3(4.5)   |        |
| Neither disagree nor agree                                                            | 147(7.7)  | 112(6.3)  | 16(31.4) | 19(28.4) | <0.001 |
| Slightly agree                                                                        | 167(8.7)  | 141(7.9)  | 11(21.6) | 15(22.4) |        |
| Agree                                                                                 | 802(42)   | 758(42.3) | 20(39.2) | 24(35.8) |        |
| Strongly agree                                                                        | 758(39.7) | 750(41.9) | 2(3.9)   | 6(9)     |        |
| 7. I feel under pressure to get the COVID-19 jab.                                     |           |           |          |          |        |

|                                                                                        |           |           |          |          |        |
|----------------------------------------------------------------------------------------|-----------|-----------|----------|----------|--------|
| Strongly disagree                                                                      | 668(35)   | 659(36.8) | 3(5.9)   | 6(9)     |        |
| Disagree                                                                               | 594(31.1) | 541(30.2) | 34(66.7) | 19(28.4) |        |
| Slightly disagree                                                                      | 175(9.2)  | 166(9.3)  | 2(3.9)   | 7(10.4)  |        |
| Neither disagree nor agree                                                             | 206(10.8) | 183(10.2) | 6(11.8)  | 17(25.4) |        |
| Slightly agree                                                                         | 163(8.5)  | 145(8.1)  | 3(5.9)   | 15(22.4) |        |
| Agree                                                                                  | 57(3)     | 51(2.8)   | 3(5.9)   | 3(4.5)   |        |
| Strongly agree                                                                         | 47(2.5)   | 47(2.6)   | 0(0)     | 0(0)     |        |
| 8. The contribution of the COVID-19 jab to my health and well-being is very important. |           |           |          |          | <0.001 |
| Strongly disagree                                                                      | 10(0.5)   | 9(0.5)    | 0(0)     | 1(1.5)   |        |
| Disagree                                                                               | 8(0.4)    | 7(0.4)    | 1(2)     | 0(0)     |        |
| Slightly disagree                                                                      | 22(1.2)   | 17(0.9)   | 1(2)     | 4(6)     |        |
| Neither disagree nor agree                                                             | 201(10.5) | 156(8.7)  | 20(39.2) | 25(37.3) |        |
| Slightly agree                                                                         | 224(11.7) | 197(11)   | 12(23.5) | 15(22.4) |        |
| Agree                                                                                  | 768(40.2) | 733(40.9) | 16(31.4) | 19(28.4) |        |
| Strongly agree                                                                         | 677(35.4) | 673(37.6) | 1(2)     | 3(4.5)   |        |
| 9. I can choose whether to get a COVID-19 jab or not.                                  |           |           |          |          | <0.001 |
| Strongly disagree                                                                      | 20(1)     | 19(1.1)   | 0(0)     | 1(1.5)   |        |
| Disagree                                                                               | 28(1.5)   | 28(1.6)   | 0(0)     | 0(0)     |        |
| Slightly disagree                                                                      | 52(2.7)   | 46(2.6)   | 1(2)     | 5(7.5)   |        |
| Neither disagree nor agree                                                             | 68(3.6)   | 52(2.9)   | 4(7.8)   | 12(17.9) |        |
| Slightly agree                                                                         | 126(6.6)  | 105(5.9)  | 9(17.6)  | 12(17.9) |        |
| Agree                                                                                  | 747(39.1) | 681(38)   | 35(68.6) | 31(46.3) |        |
| Strongly agree                                                                         | 869(45.5) | 861(48)   | 2(3.9)   | 6(9)     |        |
| 10. How the COVID-19 jab works to protect my health is a mystery to me.                |           |           |          |          | <0.001 |
| Strongly disagree                                                                      | 461(24.1) | 459(25.6) | 0(0)     | 2(3)     |        |

|                                                                     |           |           |          |          |        |
|---------------------------------------------------------------------|-----------|-----------|----------|----------|--------|
| Disagree                                                            | 430(22.5) | 425(23.7) | 1(2)     | 4(6)     |        |
| Slightly disagree                                                   | 184(9.6)  | 181(10.1) | 0(0)     | 3(4.5)   |        |
| Neither disagree nor agree                                          | 371(19.4) | 344(19.2) | 6(11.8)  | 21(31.3) |        |
| Slightly agree                                                      | 181(9.5)  | 170(9.5)  | 1(2)     | 10(14.9) |        |
| Agree                                                               | 177(9.3)  | 134(7.5)  | 28(54.9) | 15(22.4) |        |
| Strongly agree                                                      | 106(5.5)  | 79(4.4)   | 15(29.4) | 12(17.9) |        |
| 11. I get the COVID-19 jab only because I am required to do so.     |           |           |          |          | <0.001 |
| Strongly disagree                                                   | 736(38.5) | 720(40.2) | 9(17.6)  | 7(10.4)  |        |
| Disagree                                                            | 563(29.5) | 514(28.7) | 29(56.9) | 20(29.9) |        |
| Slightly disagree                                                   | 210(11)   | 198(11)   | 3(5.9)   | 9(13.4)  |        |
| Neither disagree nor agree                                          | 139(7.3)  | 118(6.6)  | 8(15.7)  | 13(19.4) |        |
| Slightly agree                                                      | 145(7.6)  | 132(7.4)  | 1(2)     | 12(17.9) |        |
| Agree                                                               | 83(4.3)   | 77(4.3)   | 1(2)     | 5(7.5)   |        |
| Strongly agree                                                      | 34(1.8)   | 33(1.8)   | 0(0)     | 1(1.5)   |        |
| 12. Getting the COVID-19 jab has a positive influence on my health. |           |           |          |          | <0.001 |
| Strongly disagree                                                   | 252(13.2) | 249(13.9) | 1(2)     | 2(3)     |        |
| Disagree                                                            | 182(9.5)  | 180(10)   | 1(2)     | 1(1.5)   |        |
| Slightly disagree                                                   | 46(2.4)   | 42(2.3)   | 1(2)     | 3(4.5)   |        |
| Neither disagree nor agree                                          | 317(16.6) | 266(14.8) | 24(47.1) | 27(40.3) |        |
| Slightly agree                                                      | 151(7.9)  | 126(7)    | 8(15.7)  | 17(25.4) |        |
| Agree                                                               | 534(28)   | 503(28.1) | 16(31.4) | 15(22.4) |        |
| Strongly agree                                                      | 428(22.4) | 426(23.8) | 0(0)     | 2(3)     |        |
